# Supplementary material
Source: MDPI journal article supplement (https://www.mdpi.com/2073-4433/12/8/959)
Supplement: s1 [file s1]

## Supplementary Figures and Tables

### Contents

|                               |    |
|-------------------------------|----|
| Supplementary Figure 1 .....  | 2  |
| Supplementary Figure 2 .....  | 3  |
| Supplementary Figure 3 .....  | 4  |
| Supplementary Figure 4 .....  | 5  |
| Supplementary Figure 5 .....  | 6  |
| Supplementary Figure 6 .....  | 7  |
| Supplementary Figure 7 .....  | 8  |
| Supplementary Figure 8 .....  | 9  |
| Supplementary Figure 9 .....  | 9  |
| Supplementary Figure 10 ..... | 11 |
| Supplementary Figure 11 ..... | 12 |
| Table S1 .....                | 13 |
| Table S2 .....                | 14 |
| Table S3 .....                | 15 |
| Table S4 .....                | 16 |
| Table S5 .....                | 17 |

Supplementary Figure S1

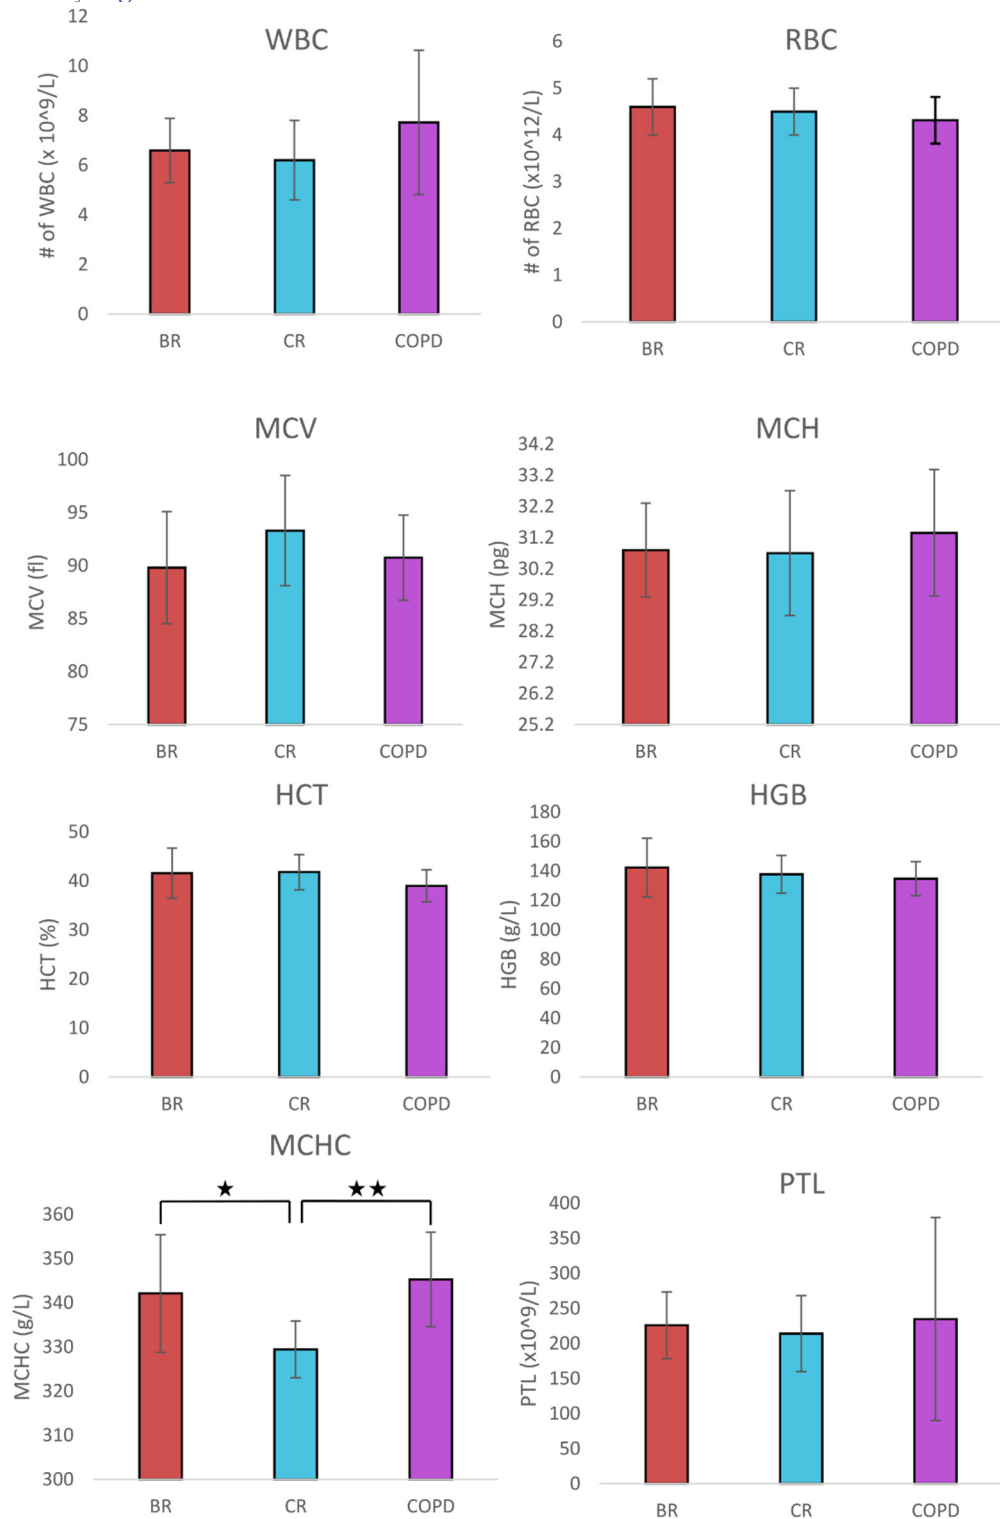

**Figure S1.** Comparison of different haematological indices among Beijing, Chengde and COPD recruits. WBC, white blood cell; RBC, red blood cell; HCT, hematocrit; HGB, hemoglobin; MCV, mean corpuscular volume; MCH, mean corpuscular hemoglobin; MCHC, mean corpuscular hemoglobin concentration; PTL, platelet; LYM, lymphocyte; NEUT: neutrophil; RDW, red blood cell volume distribution width; MPV, mean platelet volume; P-LCR, Platelet-large cell rate. \* $p < 0.05$ , \*\* $p < 0.01$ , \*\*\* $p < 0.001$ , t test.

Supplementary Figure S2

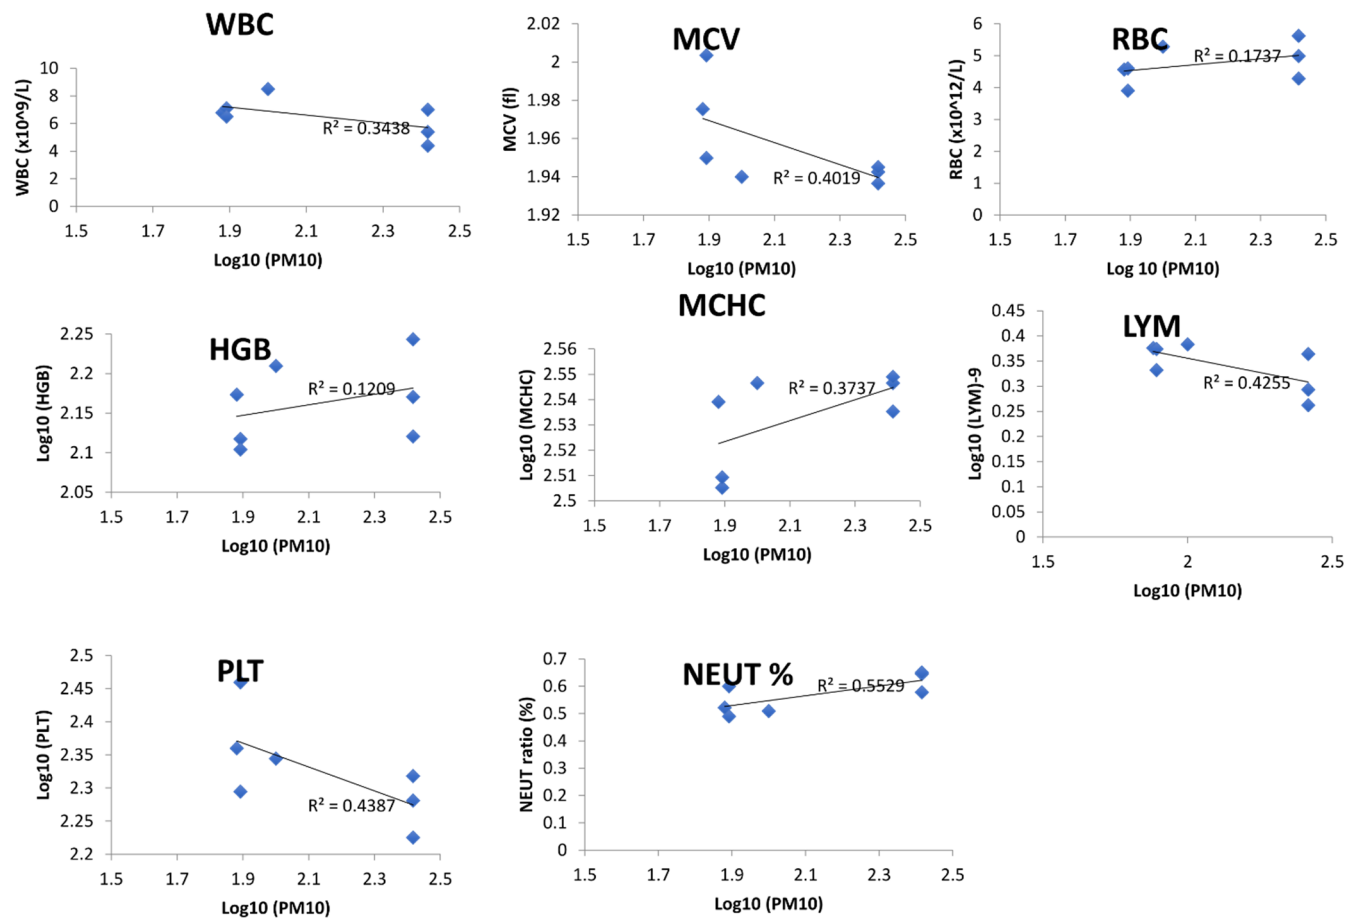

**Figure S2.** Correlation between each haematological index and  $\text{PM}_{10}$  concentration. Linear regression is conducted with  $R^2$  indicated. WBC, white blood cell; RBC, red blood cell; HCT, hematocrit; HGB, hemoglobin; MCV, mean corpuscular volume; MCH, mean corpuscular hemoglobin; MCHC, mean corpuscular hemoglobin concentration; PLT, platelet; LYM, lymphocyte; NEUT: neutrophil; RDW, red blood cell volume distribution width; MPV, mean platelet volume; P-LCR, Platelet-large cell rate.

# Supplementary Figure S3

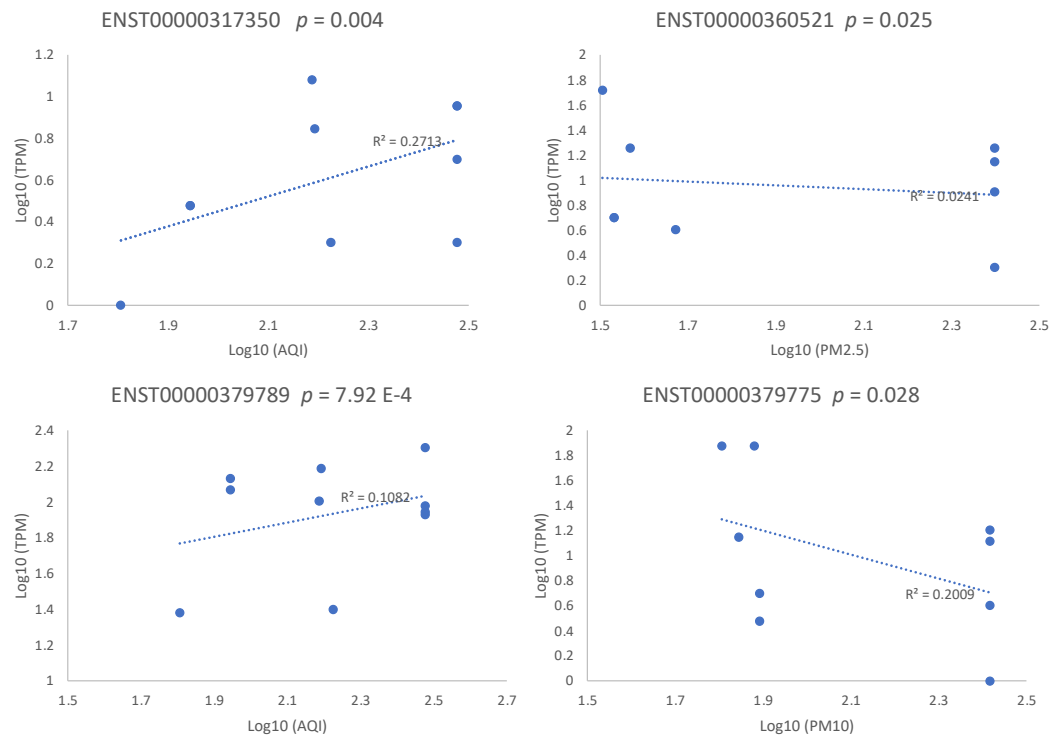

**Figure S3.** Expression levels of four *PFKFB3* isoforms show significant correlation with either PM10, PM2.5 and AQI.

# Supplementary Figure S4

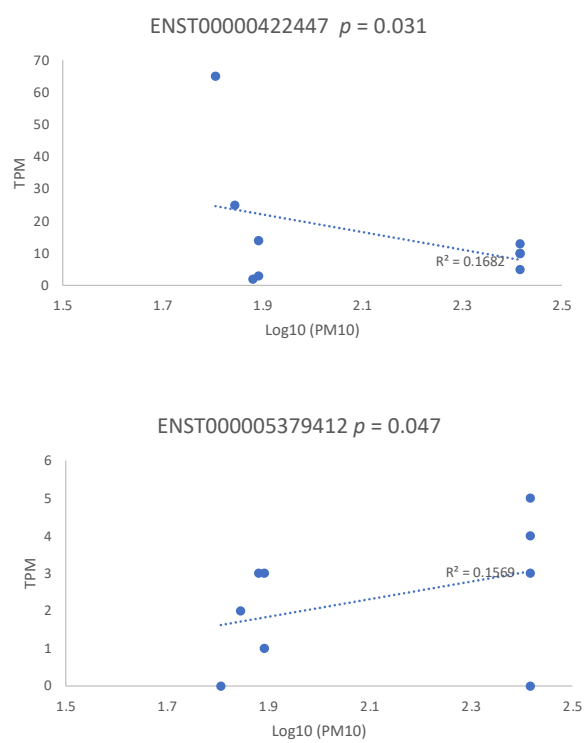

**Figure S4.** Expression levels of two *LDHA* isoforms show significant correlation with PM10.

Supplementary Figure S5

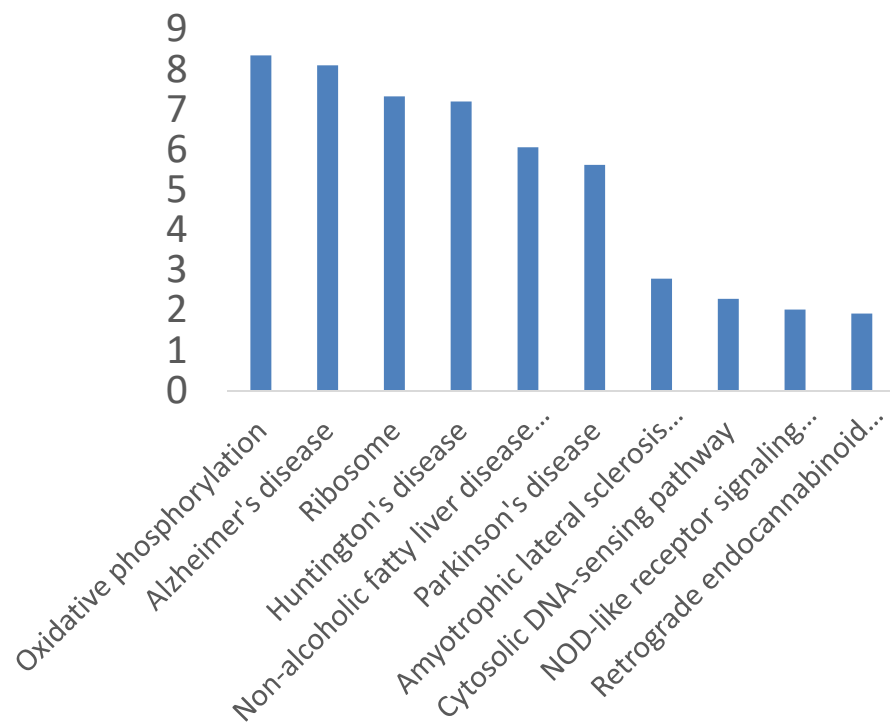

**Figure S5.** KEGG enrichment for differentially expressed transcripts down-regulated in Beijing recruits. x-axis represents the KEGG pathway names and y-axis is the log transformed  $p$ . Hypergeometric test is used.

# Supplementary Figure S6

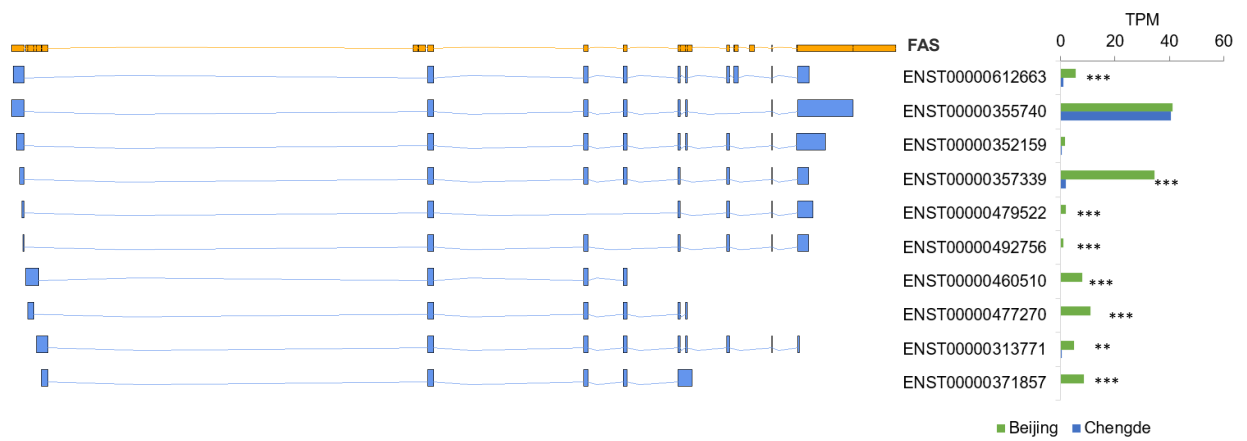

**Figure S6.** Expression of the AS isoforms of FAS in Beijing and Chengde recruits. Orange/Blue box denotes exon. *TPM* is shown on the most right, with green BR and blue CR. \*\*  $p < 0.01$ , \*\*\*  $p < 0.001$  by t-test.

Supplementary Figure S7

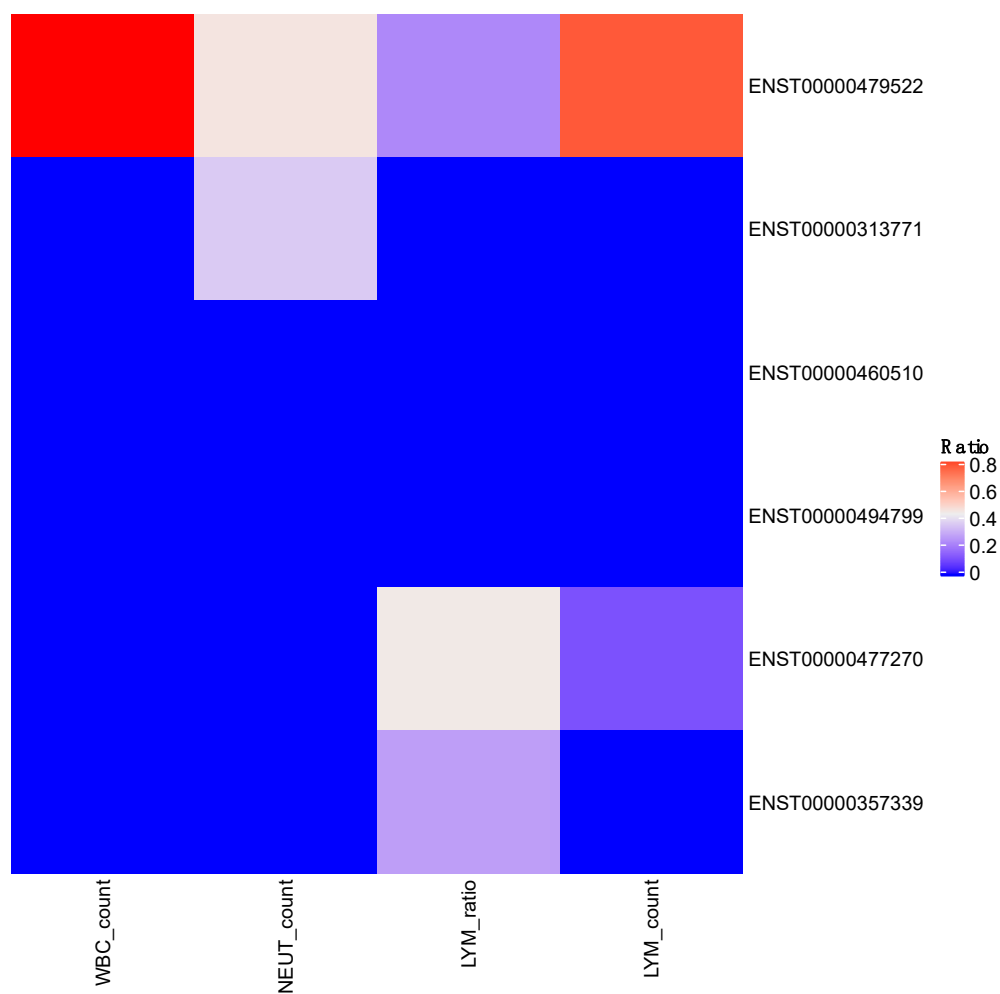

**Figure S7.** Heatmap showing variance explanation of different FAS isoforms for different haematological indices.



Supplementary Figure S8

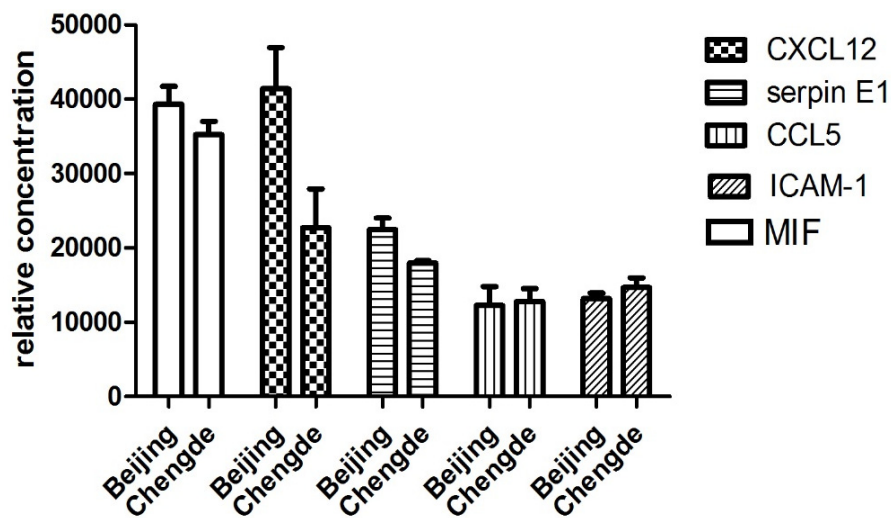

**Figure S8.** Relative concentration of plasma cytokine protein determined by cytokine array. There was a generalised increase in inflammation in Beijing subjects, whereby MIF was upregulated. There was no increase in soluble ICAM-1 but sICAM-1 was lower in the Beijing group when determined by ELISA ( $4.26 \pm 0.44$  ng/mL) versus Chengde volunteers ( $4.98 \pm 0.43$  ng/mL) however, was not statistically significant ( $p = 0.26$ ). CXCL12 (C-X-C motif chemokine 12), Serpin E1 (Serine Protease Inhibitor E1), CCL5 (Chemokine (C-C motif) ligand 5), ICAM-1 (Intercellular Adhesion Molecule 1) and MIF (Macrophage migration inhibitory factor).

Supplementary Figure S9

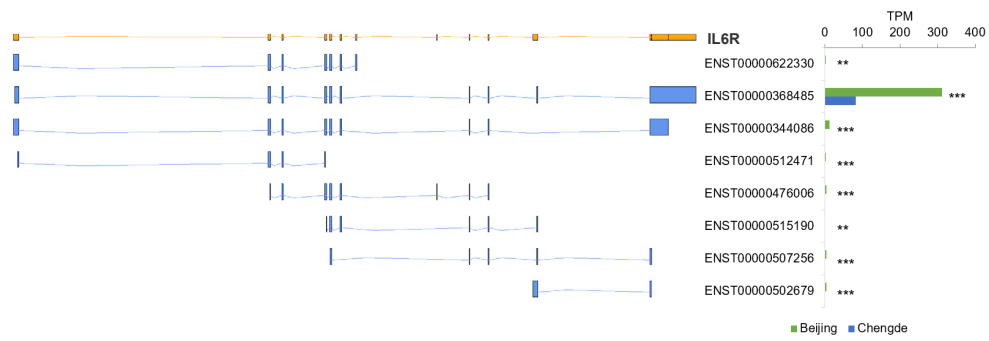

**Figure S9.** Expression of the AS isoforms of *IL6R* in Beijing and Chengde recruits. Orange/Blue box denotes exon. *TPM* is shown on the most right, with green BR and blue CR. \*\*  $p < 0.01$ , \*\*\*  $p < 0.001$  by t-test.

Supplementary Figure S10

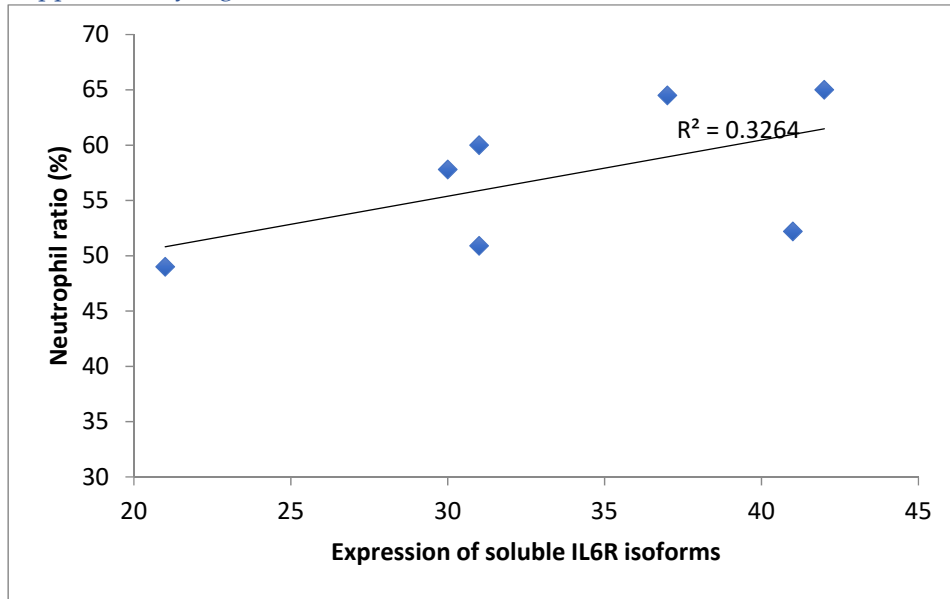

**Figure S10.** Correlation of the expression of soluble *IL6R* isoforms and neutrophil ratio.

Supplementary Figure S11

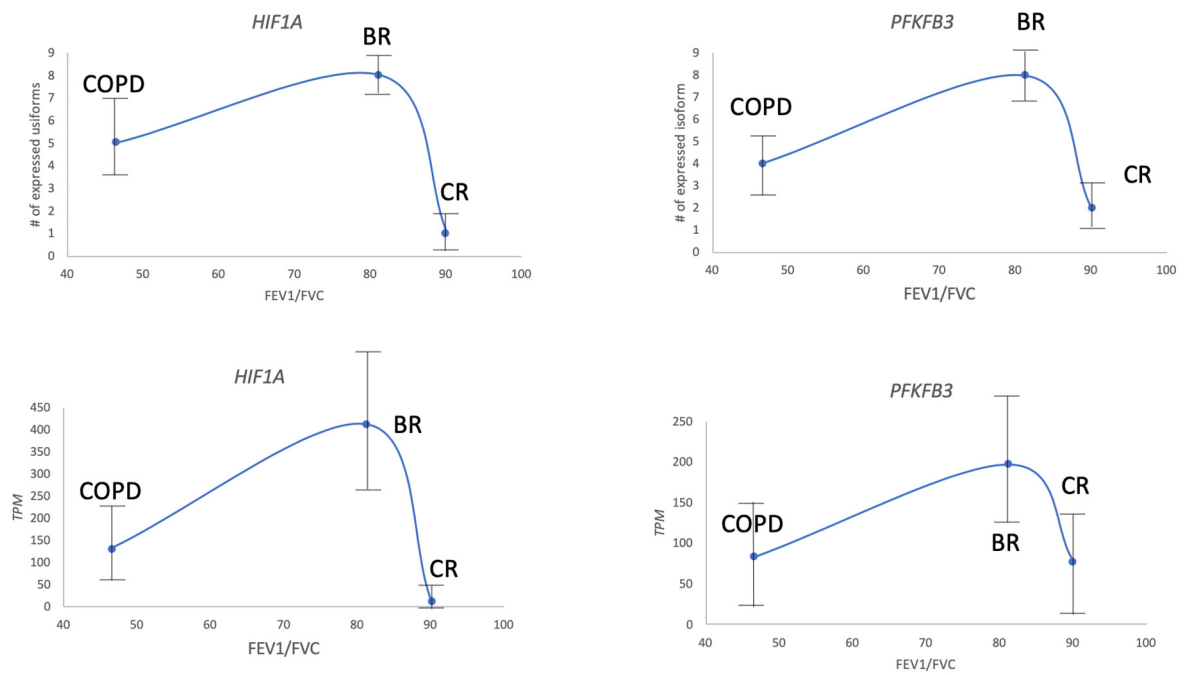

**Figure S11.** The reverse “U” pattern of both AS number and expression of *HIF1A* and *PFKFB3* genes along with lung function decrease.

Table S1

**Table S1.** Spatial and temporal distribution, chemical characteristics, and sources of ambient particulate matter in the typical cities in the BTH region. Data for Chengde is not available.

|                     | Secondary<br>Inorganics | Industrial/Steel | Coal<br>combustion | Soil/Crustal | Vehicle<br>Emissions | Other |
|---------------------|-------------------------|------------------|--------------------|--------------|----------------------|-------|
| <b>Beijing</b>      | 40.3                    | 6.7              | 8.6                | 11.5         | 20.8                 | 12.1  |
| <b>Tianjin</b>      | 40.6                    | 16.9             | 10                 | 10.1         | 17.4                 | 5     |
| <b>Baoding</b>      | 38.1                    | 13.5             | 22.6               | 8.7          | 10.2                 | 6.9   |
| <b>Cangzhou</b>     | 39.1                    | 10.7             | 17.1               | 16.7         | 11.9                 | 4.5   |
| <b>Shijiazhuang</b> | 39.1                    | 20.5             | 18.3               | 8            | 11                   | 3.1   |
| <b>Averages</b>     | 39.4                    | 13.7             | 15.3               | 9.3          | 14.3                 | 6.3   |

Table S2

**Table S2.** Daily air quality data of Beijing and Chengde averaged to produce an annual value. WHO (2005) air quality guidelines for comparison: PM<sub>2.5</sub>, 1 year 10 µg/m<sup>3</sup>, 24 h (99th percentile) 25 µg/m<sup>3</sup>; PM<sub>10</sub>, 1 year 20 µg/m<sup>3</sup>, 24 h (99th percentile) 50 µg/m<sup>3</sup>; SO<sub>2</sub> 24 h 20 µg/m<sup>3</sup>, 10 min 500 µg/m<sup>3</sup>; NO<sub>2</sub> 1 yr 40 µg/m<sup>3</sup>, 1 h 200 µg/m<sup>3</sup>; Ozone 8 h daily maximum 100 µg/m<sup>3</sup>. n/a = not applicable.

| Date | City    | AQI | PM <sub>2.5</sub> | PM <sub>10</sub> | SO <sub>2</sub> | CO  | NO <sub>2</sub> | O <sub>3</sub> 8hr | PM <sub>2.5</sub> /PM <sub>10</sub> |
|------|---------|-----|-------------------|------------------|-----------------|-----|-----------------|--------------------|-------------------------------------|
| 2015 | Beijing | 115 | 72                | 108              | 13              | 1   | 48              | 103                | 0.68                                |
|      | Chengde | 85  | 42                | 87               | 21              | 1   | 33              | 102                | 0.47                                |
| 2016 | Beijing | 114 | 73                | 101              | 10              | 1   | 49              | 96                 | 0.76                                |
|      | Chengde | 83  | 39                | 82               | 17              | 1   | 35              | 101                | 0.49                                |
| 2017 | Beijing | 101 | 56                | 92               | 8               | 1   | 45              | 101                | 0.54                                |
|      | Chengde | 79  | 35                | 85               | 17              | 1   | 34              | 96                 | 0.41                                |
| 2018 | Beijing | 92  | 50                | 78               | 6               | 1   | 41              | 100                | 0.62                                |
|      | Chengde | 77  | 32                | 78               | 13              | 1   | 33              | 98                 | 0.41                                |
| 2005 | WHO     | n/a | 10                | 20               | 20              | n/a | 40              | 100                | n/a                                 |

Table S3

**Table S3.** Functional enrichment of 6760 genes.

| <b>Terms</b>                  | <b>Count</b> | <b><i>p</i> value</b>  | <b>Adjust <i>p</i> Value</b> |
|-------------------------------|--------------|------------------------|------------------------------|
| mRNA splicing                 | 61           | $3.60 \times 10^{-16}$ | $1.20 \times 10^{-14}$       |
| mRNA processing               | 70           | $6.80 \times 10^{-16}$ | $1.90 \times 10^{-14}$       |
| mRNA splicing via Spliceosome | 46           | $5.70 \times 10^{-9}$  | $1.10 \times 10^{-5}$        |
| Spliceosomal complex          | 20           | $8.70 \times 10^{-6}$  | $3.10 \times 10^{-3}$        |
| Catalytic step 2 spliceosome  | 18           | $6.10 \times 10^{-4}$  | $1.60 \times 10^{-2}$        |

Table S4

**Table S4.** Variance explanation of each isoform of *HIF1A*, *HIF1B* (also referred as *ARNT*) and *IL6R* for each physiological index.

|                 | <b>LYM ratio</b> | <b>NEUT ratio</b> | <b>RBC count</b> | <b>MCH</b> | <b>HGB</b> | <b>RDWfl</b> |
|-----------------|------------------|-------------------|------------------|------------|------------|--------------|
| ENST00000394997 | 0                | 0.061             | 0.375            | 0.716      | 0          | 0            |
| ENST00000323441 | 0                | 0.029             | 0                | 0          | 0          | 0            |
| ENST00000553999 | 0                | 0.839             | 0                | 0          | 0          | 0            |
| ENST00000547430 | 0                | 0.071             | 0.005            | 0          | 0          | 0            |
| ENST00000337138 | 0                | 0                 | 0.326            | 0          | 0.421      | 0            |
| ENST00000556237 | 0                | 0                 | 0                | 0          | 0          | 0            |
| ENST00000557446 | 0                | 0                 | 0                | 0          | 0          | 0.607        |
| ENST00000505755 | 0                | 0                 | 0                | 0          | 0          | 0            |
| ENST00000358595 | 0.313            | 0                 | 0                | 0          | 0          | 0            |
| ENST00000505979 | 0.3              | 0                 | 0                | 0          | 0          | 0            |
| ENST00000507256 | 0                | 0                 | 0.201            | 0          | 0          | 0            |



Table S5

**Table S5.** Variance explanation of different *FAS* isoforms for different haematological indices.

|            |                 | <b>WBC count</b> | <b>NEUT count</b> | <b>LYM ratio</b> | <b>LYM count</b> |
|------------|-----------------|------------------|-------------------|------------------|------------------|
| <i>Fas</i> | ENST00000479522 | 0.859            | 0.454             | 0.225            | 0.771            |
|            | ENST00000357339 | 0                | 0                 | 0.269            | 0                |
|            | ENST00000313771 | 0                | 0.358             | 0                | 0                |
|            | ENST00000460510 | 0                | 0                 | 0                | 0                |
|            | ENST00000494799 | 0                | 0                 | 0                | 0                |
|            | ENST00000477270 | 0                | 0                 | 0.443            | 0.114            |
